# Supplementary material
Source: PubMed Central journal article supplement (PMC7323475)
Supplement: NIHMS1549147-supplement-315215_Uncut_Gel_Blots.pdf [file NIHMS1549147-supplement-315215_Uncut_Gel_Blots.pdf]

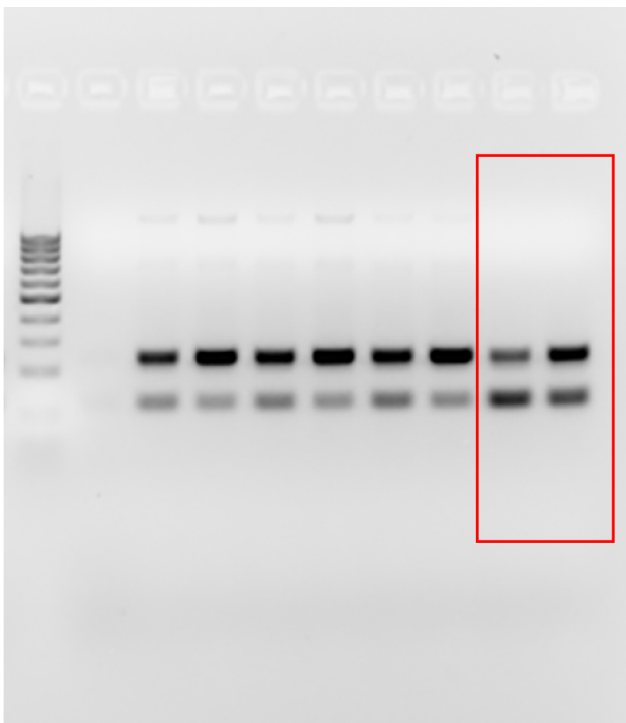

Full unedited gel for figure 7B

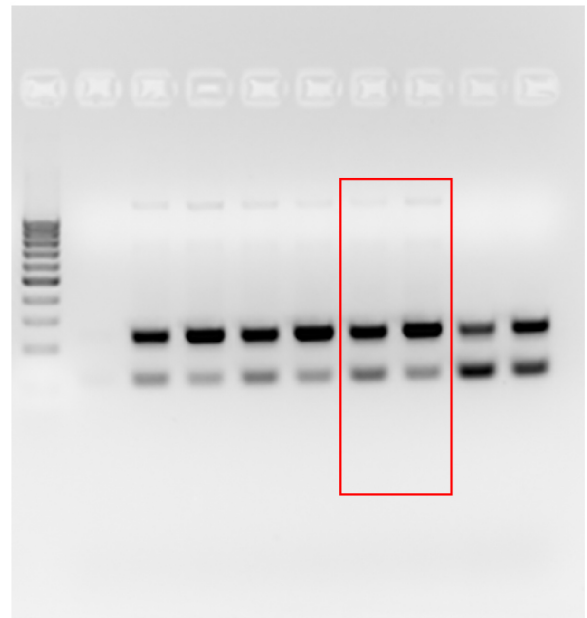

Full unedited gel figure 7C

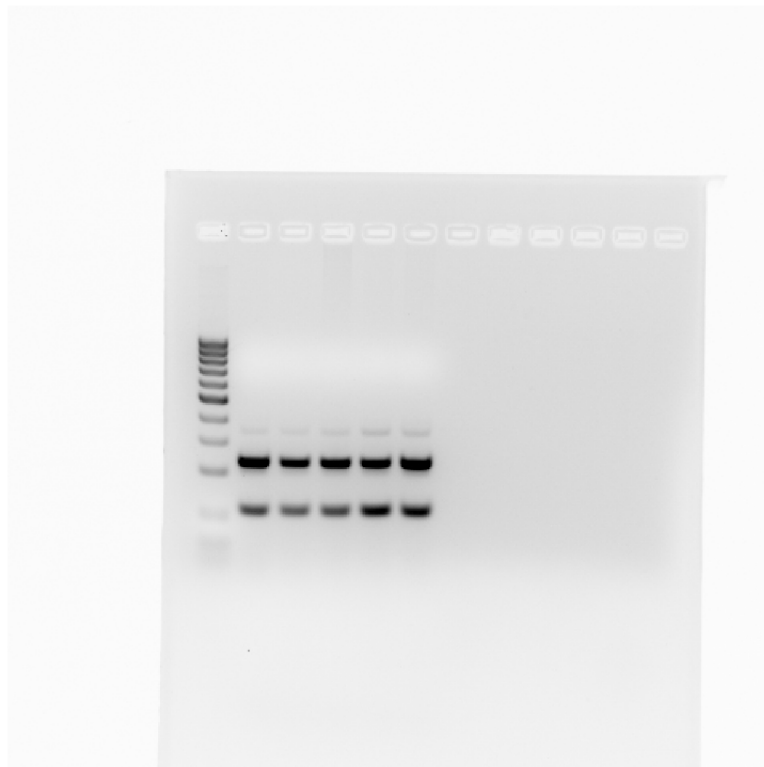

Full unedited gel for Online Figure VII

Cut membrane →

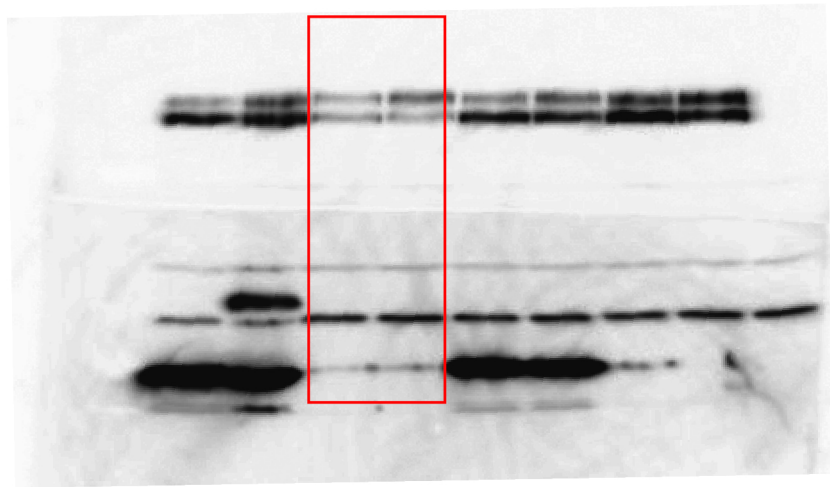

Full unedited blot for Online Figure IX
